# Supplementary material for: Genome Characterization of Bird-Related Rhabdoviruses Circulating in Africa
Source: MDPI journal article supplement (doi:10.3390/v13112168), 2021-10-27

**Figure S1.** Reads coverage of the genome sequences of the seven bird-related sunrhaviruses. The coverage is presented after a last mapping step using initial NGS data.

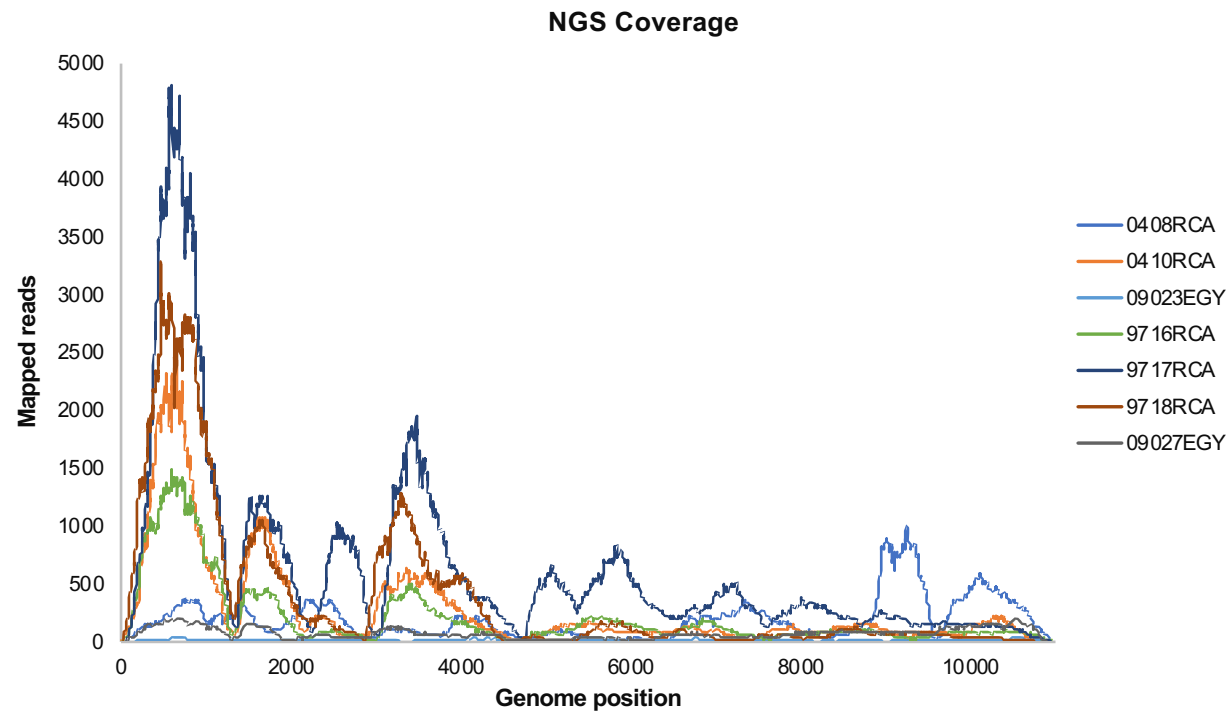

Supplement: s1 [file s1]
