# Supplementary material for: Genome Characterization of Bird-Related Rhabdoviruses Circulating in Africa
Source: MDPI journal article supplement (doi:10.3390/v13112168), 2021-10-27
Supplement: s1 [file s1]

**Figure S4.** Description of the transcription initiation (TI) and the transcription termination (TTP) signal sequences of the genes of the seven bird-related sunrhaviruses, and their positions related to the ATG of the associated ORF.

Conserved motifs are indicated in grey for TI or underlined for TTP. The consensus sequences are indicated in italic.

<sup>a</sup> The beginning of the N gene is lacking in the genome sequence obtained by NGS analysis.

<sup>b</sup> The position of the TTP and the TI signals are inverted in the genome sequence (the TTP sequence of the SH (U3) gene being after the TI sequence of the G gene, with the sequence ATCA between them).

<sup>c</sup> Beginning of the genome sequence obtained from GenBank number MK965544.

<sup>d</sup> Presence of a putative additional ORF upstream the N gene.

D: A, G or T; W: A or T; Y: C or T; S: C, G or T; H: A, C or T; M: A or C.

#### SAJV\_0408RCA

|                         |                                          |
|-------------------------|------------------------------------------|
| Leader – N <sup>a</sup> |                                          |
| N - P                   | CATGAAAAAAAACAACA - N <sub>6</sub> - ATG |
| P - M                   | CATGAAAAAAAACAACA - N <sub>9</sub> - ATG |
| M – SH (U2)             | CATGAAAAAAAACAACA - N <sub>9</sub> - ATG |
| SH (U2) - G             | CTTGAAAAAAAACAACA - N <sub>9</sub> - ATG |
| G - L                   | CATGAAAAAAAACAACA - N <sub>9</sub> - ATG |
| L - Trailer             | CGCGAAAAAAAA                             |
| Consensus               | <i>CDTGAAAAAAAACAACA</i>                 |

#### NASV\_0410RCA

|                         |                                          |
|-------------------------|------------------------------------------|
| Leader – N <sup>a</sup> |                                          |
| N - P                   | CATGAAAAAAAACAACA - N <sub>6</sub> - ATG |
| P - M                   | CATGAAAAAAAACAACA - N <sub>9</sub> - ATG |
| M – SH (U2)             | CATGAAAAAAAACAACA - N <sub>9</sub> - ATG |
| SH (U2) - G             | CATGAAAAAAAACAACA - N <sub>9</sub> - ATG |
| G - L                   | CATGAAAAAAAATAACA - N <sub>9</sub> - ATG |
| L - Trailer             | CTTGAAAAAAAA                             |
| Consensus               | <i>CWTGAAAAAAAAYAACA</i>                 |

#### BBOV\_9716RCA

|             |                     |                              |
|-------------|---------------------|------------------------------|
| Leader – N  |                     | GAACA - N <sub>6</sub> - ATG |
| N - P       | CATGAAAAAAAA        | CAACA - N <sub>9</sub> - ATG |
| P - M       | CATGAAAAAAAA        | CAACA - N <sub>9</sub> - ATG |
| M – SH (U3) | CTTGAAAAAAAA        | CAACA - N <sub>9</sub> - ATG |
| SH (U3) – G | CATGAAAAAAAA        | CAACA - N <sub>9</sub> - ATG |
| G - L       | CATGAAAAAAAACTAACA  | - N <sub>9</sub> - ATG       |
| L - Trailer | CATGAAAAAAAA        |                              |
| Consensus   | <i>CWTGAAAAAAAA</i> | <i>SAACA</i>                 |

#### KOLV\_9717RCA

|             |                     |                              |
|-------------|---------------------|------------------------------|
| Leader – N  | CATGAAAAAAAA        | CAACA - N <sub>6</sub> - ATG |
| N - P       | CATGAAAAAAAA        | CAACA - N <sub>9</sub> - ATG |
| P - M       | CATGAAAAAAAA        | CAACA - N <sub>9</sub> - ATG |
| M – SH (U2) | CTTGAAAAAAAA        | CAACA - N <sub>9</sub> - ATG |
| SH (U2) – G | CATGAAAAAAAA        | CAACA - N <sub>9</sub> - ATG |
| G - L       | CATGAAAAAAAACTAACA  | - N <sub>9</sub> - ATG       |
| L - Trailer | CATGAAAAAAAA        |                              |
| Consensus   | <i>CWTGAAAAAAAA</i> | <i>YAACA</i>                 |

#### OUAV\_9718RCA

|                          |                     |                              |
|--------------------------|---------------------|------------------------------|
| Leader – N               |                     | CAACA - N <sub>3</sub> - ATG |
| N - P                    | CATGAAAAAAAA        | TAACA - N <sub>3</sub> - ATG |
| P - M                    | TTTGAAAAAAAA        | CAACA - N <sub>6</sub> - ATG |
| M – SH (U3)              | AATAAAAAAAAA        | CAACA - N <sub>9</sub> - ATG |
| SH (U3) – G <sup>b</sup> | CATGAAAAAAAA        | CAACA - N <sub>3</sub> - ATG |
| G - L                    | CATGAAAAAAAA        | CAACA - N <sub>9</sub> - ATG |
| L - Trailer              | CTTGAAAAAAAA        |                              |
| Consensus                | <i>HWTGAAAAAAAA</i> | <i>YAACA</i>                 |

#### BEAV\_09023EGY

|                         |                     |                              |
|-------------------------|---------------------|------------------------------|
| Leader – N <sup>c</sup> |                     | AACA - N <sub>6</sub> - ATG  |
| N - P                   | CATGAAAAAAAA        | CAACA - N <sub>3</sub> - ATG |
| P - M                   | CATGAAAAAAAA        | CAACA - N <sub>9</sub> - ATG |
| M – SH (U3)             | CATGAAAAAAAA        | CAACA - N <sub>6</sub> - ATG |
| SH (U3) – G             | CTTGAAAAAAAA        | CAACA - N <sub>9</sub> - ATG |
| G - L                   | CATGAAAAAAAA        | CAACA - N <sub>9</sub> - ATG |
| L - Trailer             | CATGAAAAAAAA        |                              |
| Consensus               | <i>CWTGAAAAAAAA</i> | <i>MAACA</i>                 |

#### MTYV\_09027EGY

|             |                     |                              |
|-------------|---------------------|------------------------------|
| Leader – N  |                     | GAACA - N <sub>6</sub> - ATG |
| N - P       | CATGAAAAAAAA        | CAACA - N <sub>3</sub> - ATG |
| P - M       | CATGAAAAAAAA        | CAACA - N <sub>9</sub> - ATG |
| M – SH (U2) | ATTGAAAAAAAA        | CAACA - N <sub>6</sub> - ATG |
| SH (U2) – G | CTTGAAAAAAAA        | CAACA - N <sub>9</sub> - ATG |
| G - L       | CATGAAAAAAAA        | CAACA - N <sub>9</sub> - ATG |
| L - Trailer | CATGAAAAAAAA        |                              |
| Consensus   | <i>MWTGAAAAAAAA</i> | <i>SAACA</i>                 |
