# Supplementary material for: Genome Characterization of Bird-Related Rhabdoviruses Circulating in Africa
Source: MDPI journal article supplement (doi:10.3390/v13112168), 2021-10-27
Supplement: s1 [file s1]

**Table S5.** Description of the SH proteins from sunrhaviruses and tupaviruses. The predicted molecular weights (MW), isoelectric points (pI) and charge values (at pH 7) were determined using SnapGene software (version 5.2.3). The calculation of the instability, aliphatic and grand average of hydropathicity (GRAVY) was performed using the ProtParam tool on the ExPASy server (<https://www.expasy.org/resources/protparam>). The identification of transmembrane helices was done with the TMHMM Server (version 2.0) (<http://www.cbs.dtu.dk/services/TMHMM-2.0/>) and the Tmpred server on the ExPASy server ([https://embnet.vital-it.ch/software/TMPRED\\_form.html](https://embnet.vital-it.ch/software/TMPRED_form.html)). The putative protein topology was obtained using the normal prediction of the Phoebe server (<https://phobius.sbc.su.se/index.html>).

| Virus | Genus              | GenBank number | ORF length (nt) | Protein length (aa) | Protein MW (kDa) | pI   | Charge (pH 7) | Instability index | Aliphatic index | GRAVY Index | TMHMM helix nb. | Tmpred helix nb. | Phoebe prediction, aa position (aa number) |                       |                          |                         |
|-------|--------------------|----------------|-----------------|---------------------|------------------|------|---------------|-------------------|-----------------|-------------|-----------------|------------------|--------------------------------------------|-----------------------|--------------------------|-------------------------|
|       |                    |                |                 |                     |                  |      |               |                   |                 |             |                 |                  | Signal peptide                             | Non cyto.             | Trans. helix             | Cyto.                   |
| BBOV  | <i>Sunrhavirus</i> | MW491756       | 234             | 77                  | 9.2              | 5.52 | -2.21         | Unstable          | 121.43          | 0.718       | 2               | 2                | 1-13 (13)                                  | 14-22 (9)             | 23-49 (27)               | 50-77 (28)              |
| BEAV  | <i>Sunrhavirus</i> | MW491759       | 216             | 71                  | 8.6              | 5.56 | -1.49         | Unstable          | 123.52          | 0.665       | 0 <sup>a</sup>  | 2                | 1-20 (20)                                  | 21-29 (9)             | 30-49 (20)               | 50-71 (22)              |
| DDV   | <i>Sunrhavirus</i> | MG251664       | 228             | 75                  | 8.6              | 7.45 | 0.61          | Unstable          | 76.67           | 0.228       | 0 <sup>a</sup>  | 2                |                                            | 31-41 (11)            | 12-30 (19)<br>42-59 (18) | 1-11 (11)<br>60-75 (16) |
| DURV  | <i>Tupavirus</i>   | FJ952155       | 234             | 77                  | 9.2              | 4.47 | -4            | Unstable          | 115.06          | 0.790       | 2               | 1                |                                            | 27-31 (5)             | 5-26 (22)<br>32-48 (17)  | 1-4 (4)<br>49-77 (29)   |
| GARV  | <i>Sunrhavirus</i> | NC_055530      | 216             | 71                  | 8.7              | 5.51 | -1.49         | Unstable          | 126.20          | 0.708       | 1 <sup>a</sup>  | 2                | 1-20 (20)                                  | 21-29 (9)             | 30-49 (20)               | 50-71 (22)              |
| HDV   | <i>Sunrhavirus</i> | KJ432573       | 222             | 73                  | 8.6              | 9.36 | 2.12          | Unstable          | 124.25          | 0.523       | 2               | 2                | 1-19 (19)                                  | 20-28 (9)             | 29-49 (21)               | 50-73 (24)              |
| KLAV  | <i>Tupavirus</i>   | NC_034549      | 279             | 92                  | 10.8             | 6.64 | -0.49         | Unstable          | 116.74          | 0.420       | 2               | 2                |                                            | 1-5 (5)<br>52-92 (41) | 6-25 (20)<br>32-51 (20)  | 26-31 (6)               |
| KOLV  | <i>Sunrhavirus</i> | MW491757       | 234             | 77                  | 9.5              | 4.65 | -3.21         | Unstable          | 103.77          | 0.609       | 1               | 2                | 1-19 (19)                                  | 20-28 (9)             | 29-49 (21)               | 50-77 (28)              |
| KWAV  | <i>Sunrhavirus</i> | KM204985       | 192             | 63                  | 7.1              | 7.12 | 0.28          | Unstable          | 111.27          | 0.565       | 0               | 1                | 1-24 (24)                                  | 25-63 (39)            |                          |                         |
| MTYV  | <i>Sunrhavirus</i> | MW491760       | 216             | 71                  | 8.7              | 6.35 | -1.21         | Unstable          | 126.34          | 0.793       | 2               | 2                | 1-16 (16)                                  | 17-31 (15)            | 32-49 (18)               | 50-71 (22)              |
| NASV  | <i>Sunrhavirus</i> | MW491755       | 216             | 71                  | 8.6              | 6.55 | -0.59         | Unstable          | 134.51          | 0.708       | 2               | 2                | 1-19 (19)                                  | 20-28 (9)             | 29-49 (21)               | 50-71 (22)              |
| OUAV  | <i>Sunrhavirus</i> | MW491758       | 219             | 72                  | 8.5              | 6.35 | -1.21         | Unstable          | 129.86          | 0.969       | 2               | 2                | 1-20 (20)                                  | 21-29 (9)             | 30-50 (21)               | 51-72 (22)              |
| OV RV | <i>Sunrhavirus</i> | NC_025399      | 183             | 60                  | 6.8              | 6.4  | -1.11         | Unstable          | 91.17           | 0.595       | 0               | 2                | 1-23 (23)                                  | 24-60 (37)            |                          |                         |
| SJAV  | <i>Sunrhavirus</i> | MW491754       | 216             | 71                  | 8.6              | 6.55 | -0.59         | Stable            | 120.70          | 0.594       | 2               | 2                | 1-16 (16)                                  | 17-31 (15)            | 32-49 (18)               | 50-71 (22)              |
| SUNV  | <i>Sunrhavirus</i> | NC_025401      | 237             | 78                  | 9.3              | 6.26 | -0.17         | Unstable          | 113.72          | 0.929       | 2               | 2                | 1-19 (19)                                  | 20-28 (9)             | 29-51 (23)               | 52-78 (27)              |
| TUPV  | <i>Tupavirus</i>   | NC_007020      | 282             | 93                  | 10.6             | 7.49 | 0.79          | Stable            | 100.65          | 0.671       | 2               | 2                | 1-20 (20)                                  | 21-29 (9)             | 30-51 (22)               | 52-93 (42)              |
| WCV   | <i>Sunrhavirus</i> | NC_028232      | 216             | 71                  | 8.3              | 9.39 | 2.12          | Stable            | 130.42          | 0.755       | 2               | 2                | 1-19 (19)                                  | 20-28 (9)             | 29-49 (21)               | 50-71 (22)              |

a: Detection of two transmembrane helices in total but without significant probability.
