# Supplementary material for: Genome Characterization of Bird-Related Rhabdoviruses Circulating in Africa
Source: MDPI journal article supplement (doi:10.3390/v13112168), 2021-10-27
Supplement: s1 [file s1]

**Table S1.** Description of the primers specifically designed to fulfil gaps into the genome sequences generated after NGS sequencing.

| Virus         | Primer           | Sequence                           | Size (nt) | Position                      |
|---------------|------------------|------------------------------------|-----------|-------------------------------|
| BBOV_9716RCA  | 9716_GSP1_smart  | 5' GGATCGGCATTTTGTGAAGAGGTAGAGG 3' | 384       | 1 nt – 384 nt<br>(N gene)     |
|               | 9716_NGSP1_smart | 5' CATTCCTTGAACCGATCCTCCGACC 3'    |           |                               |
| OUAV_9718RCA  | 9718_GSP1_smart  | 5' CAGCCCGCAACAGAACACATACATCC 3'   | 461       | 1 nt – 461 nt<br>(N gene)     |
|               | 9718_NGSP1_smart | 5' GGATTTATGTCCTCACCTTGCCTTCC 3'   |           |                               |
|               | 9718-F1          | 5' GATCACATTTTCATTGGCAATGC 3'      | 347       | 4287 nt – 4633 nt<br>(G gene) |
|               | 9718-R1          | 5' GAGTCTTGTTGGTTTCTCTGAAGATG 3'   |           |                               |
|               | 9718-F2          | 5' GGATTGATTACCACAAGTTAG 3'        |           |                               |
|               | 9718-R2          | 5' CAAGTTCAGATATTCTGTATTCC 3'      |           |                               |
| MTYV_09027EGY | MTYV_GSP1_smart  | 5' CAATCCGATGCAATAAACAAACATCCAC 3' | 459       | 1 nt – 459 nt<br>(N gene)     |
|               | MTYV_NGSP1_smart | 5' CCTCTATTTACAAAAGATTCCAAGGGGC 3' |           |                               |
