# Supplementary material for: Genome Characterization of Bird-Related Rhabdoviruses Circulating in Africa
Source: Viruses. 2021 Oct 27;13(11):2168. doi: 10.3390/v13112168 (PMC8622386; doi:10.3390/v13112168)
Supplement: Supplementary file 1 [file viruses-13-02168-s001.zip]

Archive with 10 entries (10 files):
- Figure_S1_110921.pdf
- Figure_S2_240921.pdf
- Figure_S3_191021.pdf
- Figure_S4_240921.pdf
- Table_S1_220921.pdf
- Table_S2_110921.xlsx
- Table_S3_261021.xlsx
- Table_S4_220921.pdf
- Table_S5_220921.pdf
- Table_S6_191021.xlsx
