# Supplementary material for: Genome Characterization of Bird-Related Rhabdoviruses Circulating in Africa
Source: Viruses. 2021 Oct 27;13(11):2168. doi: 10.3390/v13112168 (PMC8622386; doi:10.3390/v13112168)
Supplement: Supplementary file 1 [file viruses-13-02168-s001.zip › Table_S2_110921.xlsx]

## Sheet: Table S2
Table S2. Details of the 236 rhabdoviruses included in the phylogenetic analysis.
Virus	Genus	Location of first isolation	Year of isolation	Host species	GenBank accession
Balsa almendravirus (BALV)	Almendravirus	Colombia	2013	Mosquito (Psorophora albigenu)	NC039200
Coot Bay almendravirus (CBV)	Almendravirus	USA	2013	Mosquito (Anopheles quadrimaculatus)	NC031957
Rio Chico almendravirus (RIOCV)	Almendravirus	Panama	2013	Mosquitos	NC031958
Arboretum almendravirus (ABTV)	Almendravirus	Peru	2009	Mosquito (Psorophora albigenu)	NC025393
Puerto Almendras almendravirus (PTAMV)	Almendravirus	Peru	2009	Mosquito (Ochlerotatus fulvus)	NC025395
Xingshan nematode alphanemrhavirus (XSNV)	Alphanemrhavirus	China	2014	Spirurian nematodes	NC033701
Xinzhou nematode alphanemrhavirus (XZNV)	Alphanemrhavirus	China	2015	Snake-associated nematodes	NC033705
Taro vein chlorosis nucleorhabdovirus (TVCV)	Alphanucleorhabdovirus	Fiji	2004	Taro (Colocasia esculenta)	NC006942
Maize Iranian mosaic nucleorhabdovirus (MIMV)	Alphanucleorhabdovirus	Iran	2016	Zea mays	NC036390
Eggplant mottled dwarf nucleorhabdovirus (EMDV)	Alphanucleorhabdovirus	Italy	2012	Lily (Agapanthus sp.)	NC025389
Maize mosaic nucleorhabdovirus (MMV)	Alphanucleorhabdovirus	USA	2004	Maize	NC005975
Potato yellow dwarf nucleorhabdovirus (PYDV)	Alphanucleorhabdovirus	USA	2010	Potato	NC016136
Rice yellow stunt nucleorhabdovirus (RYSV)	Alphanucleorhabdovirus	USA	1998	Rice	NC003746
Santa barbara virus (SABV)	Arurhavirus	Brazil	2010	Fly (Psychodidae sp.)	NC028234
Inhangapi virus (INHV)	Arurhavirus	Brazil	1969	Sand fly (Lutzomyia flaviscutellata)	NC028230
Xiburema virus (XIBV)	Arurhavirus	Brazil	1974	Mosquito (Sabethes intermedius)	NC025362
Aruac virus (ARUV)	Arurhavirus	Trinidad and Tobago	1955	Mosquito (Trichoprosopon theobaldi)	KM204987
Muir Springs virus (MSV)	Barhavirus	USA	1976	Mosquito (Aedes sp.)	KM204990
Bahia Grande virus (BGV)	Barhavirus	USA	1974	Mosquito (Ochlerotatus sollicitans)	KM205018
Datura yellow vein nucleorhabdovirus (DYVV)	Betanucleorhabdovirus	Australia	2014	Black-eyed susan (Thunbergia alata)	NC028231
Sonchus yellow net nucleorhabdovirus (SYNV)	Betanucleorhabdovirus	USA	1986	Cleveland's tobacco (Nicotiana edwardsonii)	NC001615
Caligus caligrhavirus (CACAV)	Caligrhavirus	Chile	2016	Sea louse (Caligus rogercresseyi)	NC043525
Lepeophtheirus salmonis rhabdovirus No127 (LSRV127)	Caligrhavirus	Norway	2013	Salmon louse (Lepeophtheirus salmonis)	KJ958536
Salmonlouse caligrhavirus (SACAV)	Caligrhavirus	Norway	2013	Salmon louse (Lepeophtheirus salmonis)	KJ958535
Iriri curiovirus (IRIRV)	Curiovirus	Brazil	1982	Sandfly (Lutzomyia sp.)	NC034544
Itacaiunas curiovirus (ITAV)	Curiovirus	Brazil	1984	Midge (Culicoides sp.)	NC034536
Curionopolis curiovirus (CURV)	Curiovirus	Brazil	1985	Midge (Culicoides sp.)	NC025354
Rochambeau Curiovirus (RBUV)	Curiovirus	French Guiana	1973	Mosquito (Coquillettidia albicosta)	NC034534
Alfalfa dwarf cytorhabdovirus (ADCV)	Cytorhabdovirus	Argentina	2011	Alfalfa (Medicago sativa)	NC028237
Lettuce necrotic yellows cytorhabdovirus (LNYV)	Cytorhabdovirus	Australia	2004	Tobacco (Nicotiana glutinosa)	NC007642
Barley yellow striate mosaic cytorhabdovirus (BYSMV)	Cytorhabdovirus	China	2014	Barley	NC028244
Strawberry crinkle cytorhabdovirus (STCV)	Cytorhabdovirus	Czech Republic	2016	Leaves (Fragaria x ananassa Duch. cv. Cacanska rana)	MH129616
Lettuce yellow mottle cytorhabdovirus (LYMV)	Cytorhabdovirus	France	2007	Lettuce	NC011532
Northern cereal mosaic cytorhabdovirus (NCMV)	Cytorhabdovirus	Japan	2000	Northern cereal	NC002251
Colocasia bobone disease-associated cytorhabdovirus (CBDV)	Cytorhabdovirus	Solomon Islands	2011	Taro (Colocasia esculenta)	NC034551
Wuhan 4 insect cytorhabdovirus (WHICV4)	Cytorhabdovirus	China	2013	Bug (Hyalopterus pruni)	NC031225
Wuhan 5 insect cytorhabdovirus (WHICV5)	Cytorhabdovirus	China	2014	Bug (Hyalopterus pruni)	NC031227
Wuhan 6 insect cytorhabdovirus (WHICV6)	Cytorhabdovirus	China	2015	Bug (Hyalopterus pruni)	NC031232
Citrus chlorotic spot dichorhavirus (CCSV)	Dichorhavirus	Brazil	2018	Century plant (Agave sp.)	MG717932
Clerodendrum chlorotic spot dichorhavirus (CCDSV)	Dichorhavirus	Brazil	2017	Peanut butter tree (Clerodendrum sp.)	NC043649
Orchid fleck dichorhavirus (OFDV)	Dichorhavirus	Japan	2005	Orchid	NC009609
Citrus leprosis N dichorhavirus (CLNV)	Dichorhavirus	South Africa	2018	Orange (Citrus sp.)	KX982181
Coffee ringspot dichorhavirus (CRDV)	Dichorhavirus	USA	2013	Coffee	NC038755
Koolpinyah ephemerovirus (KOOLV)	Ephemerovirus	Australia	1985	Bovine (Bos taurus)	NC028239
Adelaide River ephemerovirus (ARV)	Ephemerovirus	Australia	1981	Bovine	NC028246
Kimberley ephemerovirus (KIMV)	Ephemerovirus	Australia	1980	Bovine (Bos taurus)	NC025396
Berrimah ephemerovirus(BRMV)	Ephemerovirus	Australia	1981	Bovine (Bos taurus)	NC025358
Yata ephemerovirus (YATV)	Ephemerovirus	Central African Republic	1969	Mosquito (Mansonia uniformis)	NC028241
Bovine ephemeral fever ephemerovirus (BEFV)	Ephemerovirus	China	2002	Bovine	KY315724
Kotonkan ephemerovirus (KOTV)	Ephemerovirus	Nigeria	1967	Midge (Culicoides sp.)	NC017714
Malakal ephemerovirus(MALV)	Ephemerovirus	Sudan	1963	Mosquito (Mansonia uniformis)	JQ941707
Obodhiang ephemerovirus (OBOV)	Ephemerovirus	Sudan	1963	Mosquito (Mansonia uniformis)	NC017685
New Kent County virus (NKCV)	Ephemerovirus	USA	2016	Tick (Ixodes scapularis)	MF615270
Maize fine streak nucleorhabdovirus (MFSV)	Gammanucleorhabdovirus	USA	2002	Maize	NC005974
Ngaingan hapavirus (NGAV)	Hapavirus	Australia	1970	Midge	NC013955
Manitoba hapavirus (MANV)	Hapavirus	Canada	1977	Mosquito (Culex tarsalis)	NC034531
Holmes Jungle virus (HJV)	Hapavirus	Australia	1987	Mosquito (Culex annulirostris)	KY421919
Wongabel hapavirus (WONV)	Hapavirus	Australia	1979	Midge (Culicoides austropalpalis)	NC011639
Ord River hapavirus (ORV)	Hapavirus	Australia	1976	Mosquito (Culex annulirostris)	KY421920
Parry Creek hapavirus (PCV)	Hapavirus	Australia	1973	Mosquito (Culex annulirostris)	NC034449
Marco hapavirus (MCOV)	Hapavirus	Brazil	1962	Lizard (Ameiva ameiva ameiva)	NC034530
Mosqueiro hapavirus (MQOV)	Hapavirus	Brazil	1970	Mosquito (Culex portesi)	NC034448
Kamese hapavirus (KAMV)	Hapavirus	Central African Republic	1977	Mosquito (Culex pruina)	KX497133
Landjia hapavirus (LJAV)	Hapavirus	Central African Republic	1970	Bird (Riparia paludicola)	NC034533
Mossuril hapavirus (MOSV)	Hapavirus	Mozambique	1959	Mosquito (Culex sitiens)	KM204993
La Joya hapavirus (LJV)	Hapavirus	Panama	1958	Mosquito (Culex dunni)	NC034537
Joinjakaka hapavirus (JOIV)	Hapavirus	Papua-New Guinea	1966	Mosquito (Culicinae sp.)	NC034538
Gray Lodge hapavirus (GLOV)	Hapavirus	USA	1971	Mosquito (Culex tarsalis)	NC034541
Hart Park hapavirus (HPV)	Hapavirus	USA	1955	Mosquito (Culex tarsalis)	NC034447
Flanders hapavirus (FLAV)	Hapavirus	USA	1961	Mosquito (Culiseta melanura)	KM205002
Nkolbisson ledantevirus (NKOV)	Ledantevirus	Cameroon	1965	Mosquito (Eretmapodites leucopous)	NC034539
Kumasi ledantevirus (KRV)	Ledantevirus	Ghana	2011	Bat (Eidolon helvum)	NC028236
Kolente ledantevirus (KOLEV)	Ledantevirus	Guinea	1985	Tick / bat (Amblyomma variegatum / Hipposideros sp.)	NC025342
Vaprio ledantevirus (VAPV)	Ledantevirus	Italy	2016	Bat (Pipistrellus kuhlii)	MG021441
Le Dantec ledantevirus (LDV)	Ledantevirus	Senegal	1965	Human	NC034443
Kanyawara ledantevirus (KYAV)	Ledantevirus	Uganda	2010	Batfly (Dipseliopoda sp.)	NC039020
Taiyi bat vesiculovirus 958 (TYBV_958)	Ledantevirus	China	2007	Bat (Rhinolophus sinica)	MN607592
Bughendera virus (BUGV)	Ledantevirus	Uganda	2017	Batfly (Dipseliopoda sp.)	MT325641
Wuhan Louse Fly ledantevirus 5(WLFV5)	Ledantevirus	China	2013	Fly(Hippoboscidae sp.)	NC031301
Yongjia Tick ledantevirus 2(YTV2)	Ledantevirus	China	2012	Tick(Haemaphysalis hystricis)	NC031305
Barur ledantevirus (BARV)	Ledantevirus	India	1962	Rat (Rattus rattus wroughtoni)	NC034535
Nishimuro ledantevirus (NISV)	Ledantevirus	Japan	1962	Wild boar(Sus scrofa)	AB609604
Fukuoka ledantevirus (FUKV)	Ledantevirus	Japan	1982	Midge (Culicoides punctatus)	NC034454
Oita ledantevirus (OITAV)	Ledantevirus	Japan	1972	Bat (Rhinolophus cornutus)	NC034548
Mount Elgon bat ledantevirus (MEBV)	Ledantevirus	Kenya	1964	Bat (Rhinolophus hilderbrandtii eloquens)	NC034545
Fikirini ledantevirus (FKRV)	Ledantevirus	Kenya	2011	Bat (Hipposideros commersoni)	NC025341
Keuraliba ledantevirus (KEUV)	Ledantevirus	Senegal	1968	Gerbil (Tatera kempi)	NC034540
Kern Canyon ledantevirus (KCV)	Ledantevirus	USA	1968	Bat (Myotis yumanensis)	NC034451
Lone star tick rhabdovirus (LSTRV)	Lostrhavirus	USA	2009	Tick (Amblyomma americanum)	KU127239
Taiwan bat lyssavirus(TWBLV)	Lyssavirus	Taiwan	2016	Bat (Pipistrellus abramus)	MF472710
Australian bat lyssavirus (ABLV)	Lyssavirus	Australia	1996	Bat (Saccolaimus flaviventris)	NC003243
Rabies lyssavirus (RABV)	Lyssavirus	France	1983	Human/Bat	EU293121
Bokeloh bat lyssavirus(BBLV)	Lyssavirus	Germany	2010	Bat (Myotis nattererii)	NC025251
European bat 1 lyssavirus (EBLV1)	Lyssavirus	Germany	1968	Bat (Eptesicus serotinus)	EF157976
Lagos bat lyssavirus (LBV)	Lyssavirus	Ghana	2015	Bat (Eidolon helvum)	LN849915
Shimoni bat lyssavirus (SBV)	Lyssavirus	Kenya	2009	Bat (Hipposideros commersoni )	NC025365
Aravan lyssavirus (ARAV)	Lyssavirus	Kyrgyzstan	1991	Bat (Myotis blythi)	NC020808
West Caucasian bat lyssavirus (WCBV)	Lyssavirus	Russia	2001	Bat (Miniopterus schreibersii)	NC025377
Irkut lyssavirus (IRKV)	Lyssavirus	Russia	2002	Bat (Murina leucogaster)	NC020809
Mokola lyssavirus (MOKV)	Lyssavirus	South Africa	1996	Feline	KF155008
Duvenhage lyssavirus (DUVV)	Lyssavirus	South Africa	1971	Human	NC020810
Lleida bat lyssavirus(LBLV)	Lyssavirus	Spain	2011	Bat (Miniopterus schreibersii)	NC031955
Gannoruwa bat lyssavirus(GBLV)	Lyssavirus	Sri Lanka	2015	Bat (Pteropus giganteus)	NC031988
Khujand lyssavirus (KHUV)	Lyssavirus	Tajikstan	2001	Bat (Myotis mystacinus)	NC025385
Ikoma lyssavirus (IKOV)	Lyssavirus	Tanzania	2009	African civet(Civettictis civetta)	NC018629
European bat 2 lyssavirus (EBLV2)	Lyssavirus	United Kingdom	2016	Bat (Myotis daubentonii)	KY688156
Moussa mousrhavirus (MOUV)	Mousrhavirus	Cote d'Ivoire	2004	Mosquito (Culex decens)	NC025359
Piscine novirhabdovirus (PISV)	Novirhabdovirus	Germany	1998	Fish	NC000855
Hirame novirhabdovirus (HIRV)	Novirhabdovirus	Korea	1998	Rainbow trout fish	NC005093
Salmonid novirhabdovirus (SALV)	Novirhabdovirus	USA	1995	Fish	NC001652
Snakehead novirhabdovirus (SNAV)	Novirhabdovirus	USA	1999	Fish	NC000903
North Creek virus (NCV)	Ohlsrhavirus	Australia	1997	Mosquito (Culex sitiens)	KF360973
Ohlsdorf virus (OHLV)	Ohlsrhavirus	Germany	2012	Mosquito (Ochlerotatus cantans)	KY768856
Riverside virus 1 (RIVV1)	Ohlsrhavirus	Hungary	2014	Mosquito (Ochlerotatus sp.)	KU248085
Culex tritaeniorhynchus rhabdovirus (CTRV)	Ohlsrhavirus	Japan	2010	Mosquito (Culex tritaeniorhynchus)	NC025384
Merida virus (MERV)	Ohlsrhavirus	USA	2015	Mosquito (Culex quinquefasciatus)	MH310083
Culex rhabdovirus (CRV)	Ohlsrhavirus	USA	2016	Mosquito (Culex sp.)	MH188000
Anguillid perhabdovirus (EVEX)	Perhabdovirus	Denmark	1986	Sea eel (Anguilla anguilla eels)	KC608035
Perch perhabdovirus isolate 16/65 (PRV1_16/65)	Perhabdovirus	Belgium	2016	Perch (Percidae)	MN964000
Perch perhabdovirus isolate 18/193 (PRV2_18/193)	Perhabdovirus	France	1999	Perch (Percidae)	MN963996
Sea trout perhabdovirus isolate 18/203 (STPRV1_18/203)	Perhabdovirus	France	2002	Sea trout (Percidae)	MN963997
Sea trout perhabdovirus isolate R6146 (STPRV2_R6146)	Perhabdovirus	France	2005	Sea trout (Percidae)	MN963999
Sawgrass virus (SAWV)	Sawgrhavirus	USA	1964	Tick (Dermacentor variabilis)	KM205013
New Minto virus (NMV)	Sawgrhavirus	USA	1972	Rabbit tick (Haemaphysalis leporispalustris)	KM205009
Connecticut virus (CONV)	Sawgrhavirus	USA	1978	Tick (Ixodes dentatus)	KM205020
Long Island tick rhabdovirus (LITRV)	Sawgrhavirus	USA	2013	Tick (Amblyomma americanum)	NC025340
Drosophila ananassae sigmavirus (DAnaSV)	Sigmavirus	Kenya	2010	Fly (Drosophila ananassae)	NC038279
Drosophila immigrans sigmavirus (DImmSV)	Sigmavirus	China	2013	Fly (Diptera)	NC038280
Drosophila obscura sigmavirus (DObSV)	Sigmavirus	United Kingdom	2007	Fly (Drosophila obscura)	NC022580
Drosophila melanogaster sigmavirus (DMelSV)	Sigmavirus	USA	unknown	Fly	JX403934
Drosophila affinis sigmavirus(DAffSV)	Sigmavirus	USA	2007	Fly (Drosophila affinis)	KR822811
Carp sprivivirus (CSV)	Sprivivirus	China	2016	Fish (Grasscarp)	KY475636
Pike fry sprivivirus (PFRV)	Sprivivirus	France	1972	Fish (Esox lucius)	NC025356
Tench sprivivirus (TRV)	Sprivivirus	Germany	1982	Fish (Tinca tinca)	NC025371
Grass carp sprivivirus(GCRV)	Sprivivirus	Germany	1982	Fish (Ctenopharyngodon idella)	NC025376
Sena Madureira sripuvirus (SMV)	Sripuvirus	Brazil	1976	Lizard (Ameiva ameiva ameiva)	NC034529
Sripur sripuvirus (SRIV)	Sripuvirus	India	1973	Sandfly (Sergentomyia sp.)	NC034542
Almpiwar virus sripuvirus (ALMV)	Sripuvirus	Australia	1966	Lizard (Cryptoblepharus virgatus)	NC025391
Chaco sripuvirus (CHOV)	Sripuvirus	Brazil	1962	Lizard (Ameiva ameiva ameiva)	NC034550
Niakha sripuvirus (NIAV)	Sripuvirus	Senegal	1992	Sandfly (Phlebotomus duboscq and Sergentomyia sp.)	NC025405
Oak Vale virus (OVRV)	Sunrhavirus	Australia	1982	Mosquito (Culex edwardsi)	NC025399
Harrison Dam virus (HDV)	Sunrhavirus	Australia	1975	Mosquito (Culex annulirostris)	KJ432573
Walkabout Creek virus (WCV)	Sunrhavirus	Australia	1981	Midge larvae (Culicoides austropalpalis)	NC028232
Garba virus (GARV)	Sunrhavirus	Central African Republic	1970	Bird (Corythornis cristata)	KM204982
Kwatta virus (KWAV)	Sunrhavirus	Suriname	1964	Mosquito (Culex sp.)	KM204985
Sunguru virus (SUNV)	Sunrhavirus	Uganda	2013	Chicken	NC025401
Sandjimba virus (SJAV_0408RCA)	Sunrhavirus	Central African Republic	1970	Bird (Acrocephalus schoenbaeus)	MW491754
Nasoule virus (NASV_0410RCA)	Sunrhavirus	Central African Republic	1973	Bird (Andropadus virens)	MW491755
Burg el Arab virus (BEAV_09023EGY)	Sunrhavirus	Egypt	1962	Bird (Sylvia curraca)	MW491759
Bimbo virus (BBOV_9716RCA)	Sunrhavirus	Central African Republic	1970	Bird (Euplectes afra)	MW491756
Kolongo virus (KOLV_9717RCA)	Sunrhavirus	Central African Republic	1970	Bird (Euplectes afra)	MW491757
Ouango virus (OUAV_9718RCA)	Sunrhavirus	Central African Republic	1970	Bird (Ploceus melanocephalus)	MW491758
Matariya virus (MTYV_09027EGY)	Sunrhavirus	Egypt	1961	Bird (Sylvia curraca)	MW491760
Dillard's Draw virus (DDV)	Sunrhavirus	USA	2015	Mosquito (Culex tarsalis)	MG251664
Beatrice Hill tibrovirus (BHV)	Tibrovirus	Australia	1976	Culicoides peregrinus	NC039021
Ekpoma 2 tibrovirus (EKV2)	Tibrovirus	Nigeria	2011	Human	KP324828
Coastal Plains tibrovirus (CPV)	Tibrovirus	Australia	1981	Bovine	NC025397
Tibrogargan tibrovirus (TIBV)	Tibrovirus	Australia	1976	Midge (Culicoides brevitarsis)	NC020804
Ekpoma tibrovirus (EKV)	Tibrovirus	China	2017	Human	MF079256
Bas Congo tibrovirus (BASV)	Tibrovirus	Democratic Republic of the Congo	2009	Human	JX297815
Ekpoma 1 tibrovirus (EKV1)	Tibrovirus	Nigeria	2011	Human	KP324827
Sweetwater Branch tibrovirus (SWBV)	Tibrovirus	USA	1982	Midge (Culicoides insignis)	NC034546
Bivens Arm tibrovirus (BAV)	Tibrovirus	USA	1982	Midge (Culicoides insignis)	KM205019
Tupaia tupavirus (TUPV)	Tupavirus	Thailand	1999	Tree shrew	NC007020
Durham tupavirus (DURV)	Tupavirus	USA	2005	Bird	FJ952155
Klamath tupavirus (KLAV)	Tupavirus	USA	1962	Vole (Microtus montanus)	NC034549
Hainan black-spectacled toad dimarhabdovirus (HBTDRV)	unclassified Rhabdoviridae	China	2017	Asian common toad (Duttaphrynus melanostictus)	MG600016
Huangpi Tick Virus 3 (HTV3)	unclassified Rhabdoviridae	China	2012	Tick (Haemaphysalis doenitzi)	NC031083
Tacheng Tick Virus 3 (TTV3)	unclassified Rhabdoviridae	China	2013	Tick (Dermacentor marginatus)	NC031268
Bole Tick Virus 2 (BTV2)	unclassified Rhabdoviridae	China	2012	Tick (Hyalomma asiaticum)	NC031079
Shayang Fly Virus 2 (SFV2)	unclassified Rhabdoviridae	China	2012	Fly (Musca domestica)	NC031215
Wuhan Louse Fly Virus 10 (WLFV10)	unclassified Rhabdoviridae	China	2013	Biting fly (Hippoboscidae sp.)	NC031240
Wuhan Fly Virus 2 (WFV2)	unclassified Rhabdoviridae	China	2013	Fly (Musca domestica)	NC031278
Wuhan Insect virus 7 (WHIV7)	unclassified Rhabdoviridae	China	2013	Bug (Hyalopterus pruni)	NC031236
Scophthalmus maximus rhabdovirus (SMRV)	unclassified Rhabdoviridae	China	2010	Fish (Scophthalmus maximus)	NC025387
Wuhan House Fly Virus 1 (WHFV1)	unclassified Rhabdoviridae	China	2013	Fly (Musca domestica)	KM817648
Siniperca chuatsi rhabdovirus (SCRV)	unclassified Rhabdoviridae	China	Unknown	Fish (Siniperca chuatsi )	NC008514
Menghai rhabdovirus (MRV)	unclassified Rhabdoviridae	Japan	2017	Mosquito (Aedes albopictus)	LC270812
Dolphin rhabdovirus (DRV)	unclassified Rhabdoviridae	Netherlands	1992	White-beaked dolphin (Lagenorhynchus albirostris)	NC025406
Eelpout rhabdovirus (ERV)	unclassified Rhabdoviridae	Sweden	2014	Viviparous eelpout (Zoarces viviparus)	KR612230
Pararge aegeria rhabdovirus (PARV)	unclassified Rhabdoviridae	UK	2015	Butterfly (Pararge aegeria)	KR822826
Harlingen virus (HARV)	unclassified Rhabdoviridae	USA	2001	Mosquito (Culex salinarius)	KM205003
Gata virus (GATV)	unclassified Rhabdoviridae	USA	2016	Butterfly (Orgyia pseudotsugata)	NC031691
Orgi virus (ORGV)	unclassified Rhabdoviridae	USA	2016	Butterfly (Orgyia pseudotsugata)	NC031690
Wuhan Tick Virus 2 (WTV2)	unclassified Rhabdoviridae	China	2012	Tick (Rhipicephalus microplus)	KM817611
Blacklegged tick chuvirus-2 (BTCV2)	unclassified Rhabdoviridae	USA	2016	Tick (Ixodes scapularis)	MF360789
Apis rhabdovirus 2 (ARV2)	unclassified Rhabdoviridae	Tonga	2015	Bee (Apis mellifera)	KY354234
Apis rhabdovirus 1 (ARV1)	unclassified Rhabdoviridae	Israel	2013	Mite (Varroa destructor)	MF114351
Dog Tick rhabdovirus-1(DTRV1)	unclassified Rhabdoviridae	USA	2016	Tick (Ixodes scapularis)	MF360791
Farmington virus (FARV)	unclassified Rhabdoviridae	USA	1969	Wild bird	NC025253
Tacheng Tick Virus 7 (TTV7)	unclassified Rhabdoviridae	China	2013	Tick (Argas miniatus)	NC031272
Spodoptera frugiperda rhabdovirus (SFRV)	unclassified Rhabdoviridae	USA	2013	Fall armyworm (Spodoptera frugiperda)	NC025382
Wuhan Ant Virus (WAV)	unclassified Rhabdoviridae	China	2013	Ant (Camponotus japonicus)	NC031276
Diachasmimorpha longicaudata rhabdovirus (DLRV)	unclassified Rhabdoviridae	USA	2014	Parasitoid wasp (Diachasmimorpha longicaudata)	NC030451
Grenada mosquito rhabdovirus 1 (GMRV1)	unclassified Rhabdoviridae	Grenada	2015	Grenada mosquito (Deinocerites sp.)	MG385079
Wuhan Mosquito Virus 9 (WMV9)	unclassified Rhabdoviridae	China	2013	Mosquito (Culex tritaeniorhynchus)	NC031303
Blacklegged tick rhabdovirus-1 (BTRV1)	unclassified Rhabdoviridae	USA	2016	Tick (Ixodes scapularis)	MF360790
Chimay rhabdovirus (CHRV)	unclassified Rhabdoviridae	Belgium	2009	Tick (Ixodes ricinus)	MF975531
Wuhan House Fly Virus 2 (WHFV2)	unclassified Rhabdoviridae	China	2013	Wuhan house fly(Musca domestica)	NC031283
Shayang Fly Virus 3 (SFV3)	unclassified Rhabdoviridae	China	2012	Shayang fly (Chrysomya megacephala)	NC031216
Wenling dimarhabdovirus 10 (WDRV10)	unclassified Rhabdoviridae	China	unknown	Vertebrate	MG600019
Fox fecal rhabdovirus (FFRV)	unclassified Rhabdoviridae	Spain	2013	Fox (Vulpes vulpes)	NC028867
Wenling dimarhabdovirus 8 (WDRV8)	unclassified Rhabdoviridae	China	unknown	Fish (Okamejei acutispina)	MG600017
Beihai dimarhabodovirus 1 (BDRV1)	unclassified Rhabdoviridae	China	unknown	Vertebrate	MG600012
Fujian dimarhabdovirus (FDRV)	unclassified Rhabdoviridae	China	unknown	Newt (Pachytriton brevipes)	MG600015
Wenling dimarhabdovirus 9 (WDRV9)	unclassified Rhabdoviridae	China	unknown	Vertebrate	MG600018
Wenling dimarhabdovirus 1 (WDRV1)	unclassified Rhabdoviridae	China	unknown	Vertebrate	MG600014
Chinese rice-field eel rhabdovirus (CRFERV)	unclassified Rhabdoviridae	China	2017	Chinese rice-field eel (Monopterus albus)	MH319839
Harbour porpoise rhabdovirus (HPRV)	unclassified Rhabdoviridae	USA	2013	Dolphin (Phocoena phocoena)	MN103537
Micropterus salmoides rhabdovirus (MSRV)	unclassified Rhabdoviridae	China	2017	Largemouth bass (Micropterus salmoides)	MK397811
Wuhan redfin culter dimarhabodovirus (WRCDRV)	unclassified Rhabdoviridae	China	Unknown	Predatory carp (Chanodichthys erythropterus)	MG600013
Frog lyssa-like virus 1 (FLLV-1)	unclassified Rhabdoviridae	USA	2016	American green treefrog (Dryophytes cinereus)	MK473367
Anole lyssa-like virus 1 (ALLV-1)	unclassified Rhabdoviridae	Cuba	2011	Anolis allogus	BR001666
Sodak rhabdovirus 2 (SDRV2)	unclassified Rhabdoviridae	USA	2020	Bat (Eptesicus fuscus)	MT732687
Sodak rhabdovirus 1 (SDRV1)	unclassified Rhabdoviridae	USA	2020	Bat (Eptesicus fuscus)	MT875151
Lettuce big-vein associated varicosavirus (LBVV)	Varicosavirus	Japan	2003	Lettuce	NC011558
Piry vesiculovirus(PIRV)	Vesiculovirus	Brazil	1960	Gray four-eyed opossums (Philander opossum)	KU178986
Jurona vesiculovirus (JURV)	Vesiculovirus	Brazil	1962	Human	NC025392
Carajas vesiculovirus (CARV)	Vesiculovirus	Brazil	1983	Sandfly (Lutzomyia sp.)	KM205015
Maraba vesiculovirus (MARAV)	Vesiculovirus	Brazil	1983	Sandfly	NC025255
VS Alagoas vesiculovirus (VSAV)	Vesiculovirus	Brazil	1964	Mule	NC025353
Jinghong bat vesiculovirus (JHBV)	Vesiculovirus	China	2011	Bat (Rhinolophus affinis)	MF279192
Morreton vesiculovirus (MORV)	Vesiculovirus	Colombia	1986	Sandfly (Lutzomyia sp.)	NC034508
VS New Jersey vesiculovirus (VSNJV)	Vesiculovirus	Honduras	1984	Bovine	NC024473
Chandipura vesiculovirus (CHNV)	Vesiculovirus	India	2004	Human	NC020805
Isfahan vesiculovirus (ISFV)	Vesiculovirus	Iran	1975	Sandfly (Phlebotomus papatasi)	NC020806
Radi vesiculovirus (RADIV)	Vesiculovirus	Italy	1982	Sandfly (Phlebotomus perfiliewi)	KM205024
Perinet vesiculovirus (PERV)	Vesiculovirus	Madagascar	2008	Mosquito	NC025394
Yug Bogdanovac vesiculovirus (YBV)	Vesiculovirus	Serbia	2011	Sandfly (Vero-E6 cells)	NC025378
Cocal vesiculovirus (COCV)	Vesiculovirus	Trinidad	1961	Rodent	EU373657
American bat vesiculovirus (ABV)	Vesiculovirus	USA	2008	Bat (Eptesicus fuscus)	NC022755
Malpais Spring vesiculovirus (MSPV)	Vesiculovirus	USA	1985	Mosquito (Aedes campestris)	NC025364
VS Indiana vesiculovirus (VSIV)	Vesiculovirus	USA	1998	Horse	NC001560
Qiongzhong bat vesiculovirus 1127 (QZBV_1127)	Vesiculovirus	China	2007	Bat (Rhinolophus affinis)	MN607593
Yinshui bat vesiculovirus D170001 (YSBV_D170001)	Vesiculovirus	China	2018	Bat (Rhinolophus sinica)	MN607595
Zahedan rhabdovirus (ZRV)	Zarhavirus	Iran	2001	Tick (Hyalomma anatolicum anatolicum)	KJ830812
