# Supplementary material for: Genome Characterization of Bird-Related Rhabdoviruses Circulating in Africa
Source: Viruses. 2021 Oct 27;13(11):2168. doi: 10.3390/v13112168 (PMC8622386; doi:10.3390/v13112168)
Supplement: Supplementary file 1 [file viruses-13-02168-s001.zip › Table_S3_261021.xlsx]

## Sheet: Table S3A_C_protein
Table S3. Amino acid identities of C (Table S3A) and SH (Table S3B) proteins of sunrhaviruses and tupaviruses. Identities were calculated as pairwise deletion using MEGA7.0.
C proteins 11 (out of 14) of sunrhaviruses
Protein	Pairwise amino acid identity (%)
	BBOV_C	BEAV_C	GARV_C	HDV_C1	KOLV_C	MTYV_C	NASV_C	OUAV_C	SJAV_C	SUNV_C	WCV_C
BBOV_C
BEAV_C	27.1
GARV_C	28	57.9
HDV_C1	20.2	20.3	21.4
KOLV_C	70.1	27.1	26.1	15.7
MTYV_C	31	62.1	72.8	23	27
NASV_C	32.5	32	36.4	27.5	32.5	37
OUAV_C	29	37.8	35.5	26	29	40	36.5
SJAV_C	33.7	34.9	39.2	28.7	32.5	39	80.4	37.6
SUNV_C	10.6	21.3	19	16	12.9	20.6	16.7	19	16.7
WCV_C	16.6	28.1	27.1	58.8	15.6	28.1	21.5	27.1	22.5	17.5
C proteins of 3 (out of 14) sunrhaviruses
Protein	Pairwise amino acid identity (%)
	DDV_C1	KWAV_C	OVRV_C1
DDV_C1
KWAV_C	21.5
OVRV_C1	71.4	18.9
C proteins of tupaviruses
Protein	Pairwise amino acid identity (%)
	DURV_C	KLAV_C	TUPV_C
DURV_C
KLAV_C	10.4
TUPV_C	6.9	15.7

## Sheet: Table S3B_SH_protein
Table S3. Amino acid identities of C (Table S3A) and SH (Table S3B) proteins of sunrhaviruses and tupaviruses. Identities were calculated as pairwise deletion using MEGA7.0.
SH proteins of 11 (out of 14) sunrhaviruses and tupaviruses
Protein	Pairwise amino acid identity (%)
	BBOV_SH	BEAV_SH	DURV_SH	GARV_SH	HDV_SH	KLAV_SH	KOLV_SH	MTYV_SH	NASV_SH	OUAV_SH	SJAV_SH	SUNV_SH	TUPV_SH	WCV_SH
BBOV_SH
BEAV_SH	35.8
DURV_SH	20.7	17.9
GARV_SH	35.8	81.6	17.9
HDV_SH	25.9	21.6	19.4	22.9
KLAV_SH	21.7	19.3	25	16.1	18.4
KOLV_SH	68.8	41	23.3	39.7	24.6	20.6
MTYV_SH	38.4	84.5	16.6	83	20.2	16.1	41
NASV_SH	40.2	47.2	16.8	44.4	23.2	17.3	33.7	47.2
OUAV_SH	42.3	43	15.3	44.4	27	17.2	37.1	43	44.4
SJAV_SH	38.9	47.2	16.8	44.4	21.9	16.3	32.4	43	85.9	47.2
SUNV_SH	24.3	25.3	21.7	26.5	37.1	17.3	21.7	27.8	25.6	25.3	28.2
TUPV_SH	17.2	18	21.5	15.9	21.5	26.8	13.9	18	17.2	13.8	19.3	21.5
WCV_SH	27.2	22.2	22	20.8	72.6	16.3	23.3	25	28.1	27.7	23.9	34.6	23.6
SH proteins of 3 (out of 14) sunrhaviruses
Protein	Pairwise amino acid identity (%)
	DDV_C1	KWAV_C	OVRV_C1
DDV_C1
KWAV_C	22.7
OVRV_C1	56	26.1
