# Supplementary material for: Genome Characterization of Bird-Related Rhabdoviruses Circulating in Africa
Source: Viruses. 2021 Oct 27;13(11):2168. doi: 10.3390/v13112168 (PMC8622386; doi:10.3390/v13112168)
Supplement: Supplementary file 1 [file viruses-13-02168-s001.zip › Table_S6_191021.xlsx]

## Sheet: Table S6
Table S6. Amino acid identities of each canonical proteins (N, P, M, G and L) of sunrhaviruses. Identities were calculated as pairwise deletion using MEGA7.0, colored from green (low identity values) to red (high identity values)
Protein	Pairwise amino acid identity (%)
	SJAV_0408RCA	NASV_0410RCA	KOLV_9717RCA	MTYV_09027EGY	BBOV_9716RCA	BEAV_09023EGY	OUAV_9718RCA	GARV	HDV	WCV	SUNV	KWAV	DDV	OVRV
N protein
SJAV_0408RCA
NASV_0410RCA	81
KOLV_9717RCA	51.3	50.4
MTYV_09027EGY	49.1	47	46.4
BBOV_9716RCA	48.9	49.4	81	47.5
BEAV_09023EGY	48.2	47.5	49	79.9	49.4
OUAV_9718RCA	46.5	45.3	46.7	56	48.4	53.9
GARV	50.8	48.9	48.5	86.6	48.9	79.6	54.8
HDV	37.6	36.9	38.3	35.7	38	37.4	33.3	37.1
WCV	37.6	37.4	38.1	35	37.6	38.1	31.6	36.9	86.5
SUNV	36.1	37.5	37.3	34	37	36.1	34.1	37.5	46.1	48
KWAV	26.1	25.4	25.9	26	26.8	25.5	24.3	26	26.1	26.8	29.6
DDV	24.1	23.8	25.1	25.2	26.5	26.7	26.5	26.1	27.7	27.9	28	33.1
OVRV	24	23.8	25	26.2	26.7	26	25.3	26.2	26.9	27.6	29	34.6	68.5
P protein
SJAV_0408RCA
NASV_0410RCA	68.3
KOLV_9717RCA	20.5	20.5
MTYV_09027EGY	25.3	22.7	21.1
BBOV_9716RCA	21.6	22.9	61.8	22.8
BEAV_09023EGY	25.5	27.4	18.6	52.9	20.7
OUAV_9718RCA	28	23.9	22.2	25.1	20.9	23.2
GARV	25.8	24.3	20.7	68.8	20	54.1	24.4
HDV	18.3	17.3	14.7	20.8	12	17.7	15.8	19.1
WCV	15.6	15	17	19.4	13.3	17.7	17.2	18	71.1
SUNV	16.1	14.2	13.2	18.7	13.2	15.4	19	18	12	12.7
KWAV	8.3	7.7	7.7	6.6	6	5.7	6.3	6	9.4	9.7	9.1
DDV	8	8	7.7	7.8	8.3	10.4	9.5	8	9.3	10.1	6.3	12.5
OVRV	6	7	7	6.6	8.3	9.6	7.5	6.3	7.9	9.2	6.5	11.2	45
M protein
SJAV_0408RCA
NASV_0410RCA	64.9
KOLV_9717RCA	26.5	23.6
MTYV_09027EGY	30.8	25	27.7
BBOV_9716RCA	27.7	25.4	66.4	23.6
BEAV_09023EGY	29.6	27.3	25.4	58.1	29.4
OUAV_9718RCA	27.3	27.3	31.2	30.8	30.6	29.6
GARV	31.9	29	26.5	73.2	26	54.6	27.9
HDV	21.9	20.2	23.5	24.7	22.4	21.9	24.7	21.9
WCV	21.9	20.7	24.7	24.1	24.7	24.7	26.9	23	79.7
SUNV	19.7	16.9	16.9	16.9	17.5	16.3	18.6	17.5	18.3	18.8
KWAV	15.2	11.2	9.5	11.2	11.7	10.7	11.3	12.4	7.1	7.1	10
DDV	14.7	13.1	13.5	12.5	10.8	8.1	9.6	14.2	10.5	10.5	10.1	22.8
OVRV	14.3	13.7	12	12	9.1	8.6	13.6	13.7	11.6	11.1	10.6	25.1	59
G protein
SJAV_0408RCA
NASV_0410RCA	72.9
KOLV_9717RCA	41.3	39.5
MTYV_09027EGY	43.9	41.1	38.7
BBOV_9716RCA	39	39.5	66.4	38.5
BEAV_09023EGY	42.9	40.8	39	68.4	36.7
OUAV_9718RCA	44.2	45.3	36.1	48.4	39	47.2
GARV	42	40	39.1	73.5	37.3	66.9	47.5
HDV	28.6	29.1	25.2	31.3	25.7	30.8	32	30.9
WCV	29.1	28.8	26.1	30.9	25.9	31.4	30.7	31	75.5
SUNV	30.4	30.8	27.3	30.2	27.3	29.5	31.5	30.1	40.4	40.6
KWAV	25	25.3	24.4	24.1	23.7	24.3	24.4	23.6	23.8	21.4	24.2
DDV	21.6	20.3	22.9	21	22.2	21	22.5	21.4	21.7	20.7	23.1	42.5
OVRV	21.8	21.5	22.8	23.6	22.6	23.9	22.4	22.8	22.3	20.8	22.3	40.2	72.5
L protein
SJAV_0408RCA
NASV_0410RCA	83.1
KOLV_9717RCA	62.9	61.9
MTYV_09027EGY	64.6	62.6	60.8
BBOV_9716RCA	63.8	61.6	82.5	61.1
BEAV_09023EGY	63.2	62.8	60.4	79.6	60.5
OUAV_9718RCA	61.6	60.9	58.9	63.3	59.4	63.8
GARV	63.4	62.9	60.3	82.9	59.6	78.2	63.8
HDV	54.1	54.2	52.4	53.7	53.3	54	54.4	53.2
WCV	54.2	53.5	52.5	53.6	52.9	53.5	54.1	53.3	85.2
SUNV	51.2	50.7	49.7	48.7	50.1	50.2	49.4	49.7	53.8	52.9
KWAV	39.8	39.2	39.6	40	39.1	40.7	39.7	40.2	40.8	39.8	39
DDV	38.3	38.7	39	39	38.3	39.3	39.2	38.8	40.7	39.7	38.2	53.4
OVRV	39.1	39.5	39.7	38.6	38.5	39	38.7	39.2	39.5	39.1	38	54.3	71.6
